# Supplementary material for: Effects of particulate matter (PM) on childhood asthma exacerbation and control in Xiamen, China
Source: Springer Nature journal article supplement (doi:10.1186/s12887-019-1530-7), 2019-06-13
Supplement: MOESM2 [file 16807550]

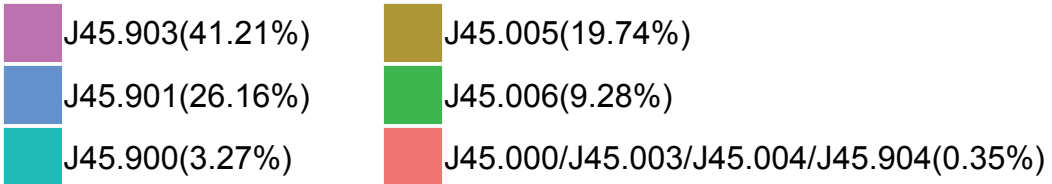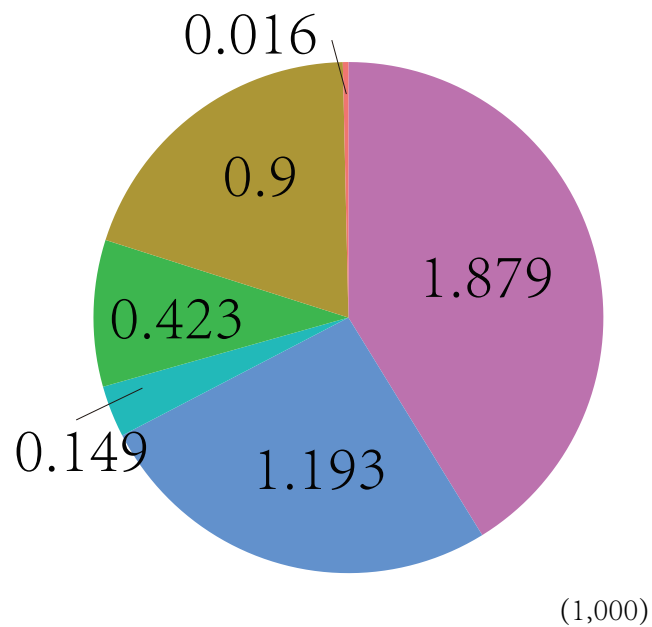

(a)

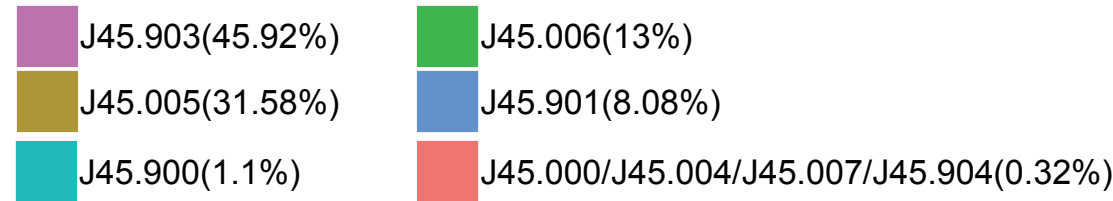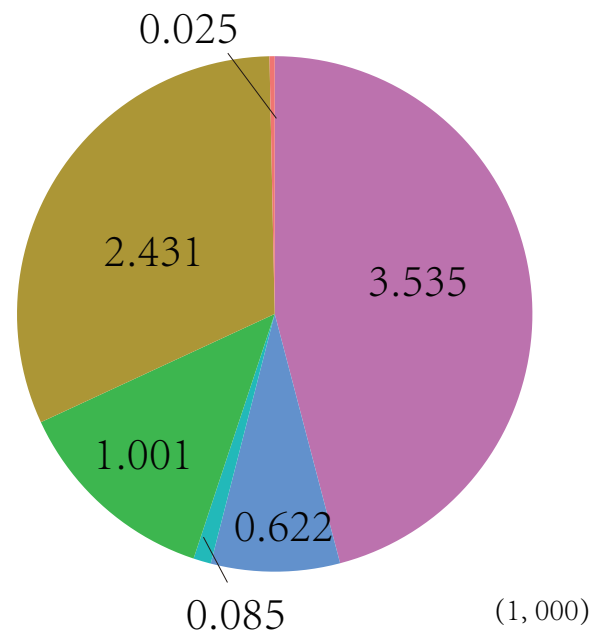

(b)
